# Supplementary material for: Methionine as a regulator of bone remodeling with fasting
Source: PubMed Central journal article supplement (PMC11383369; doi:10.1172/jci.insight.177997), 2024-05-21
Supplement: jciinsight-9-177997-s046.pdf [file jciinsight-9-177997-s046.pdf]

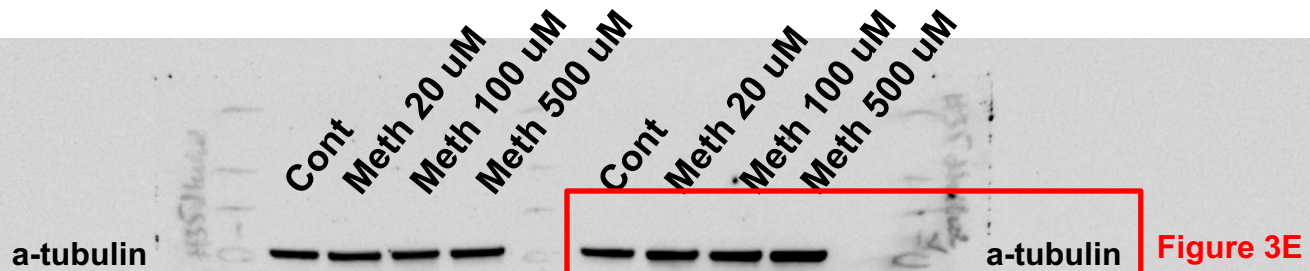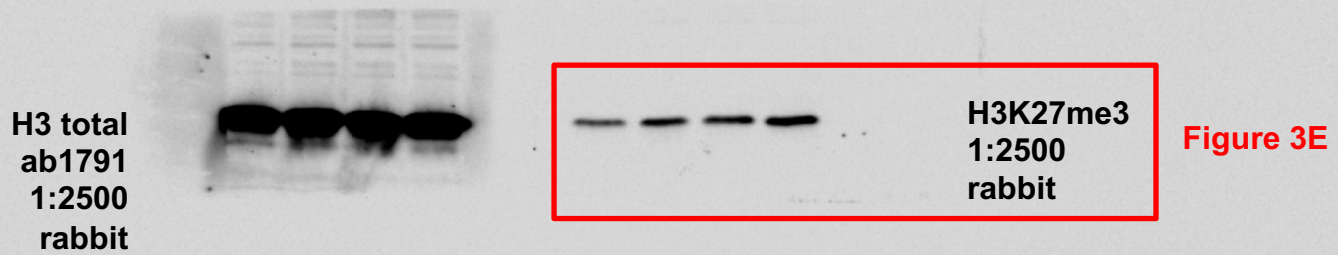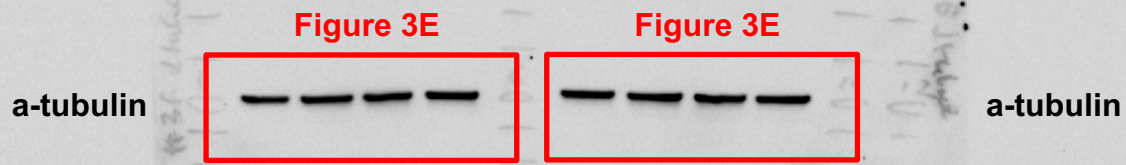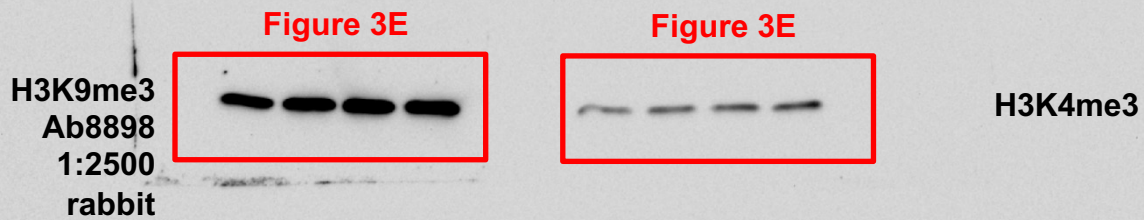

RUNX2  
Rabbit Ab #12556 Cell  
Signaling  
1:1000  
rabbit

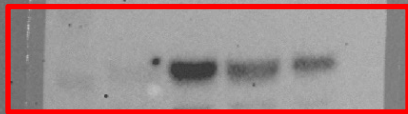

Cont  
Meth 20 uM  
Meth 100 uM  
Meth 500 uM

Figure 3D

OCN  
Rabbit Ab # 133612  
Cell Signaling  
1:1000  
rabbit

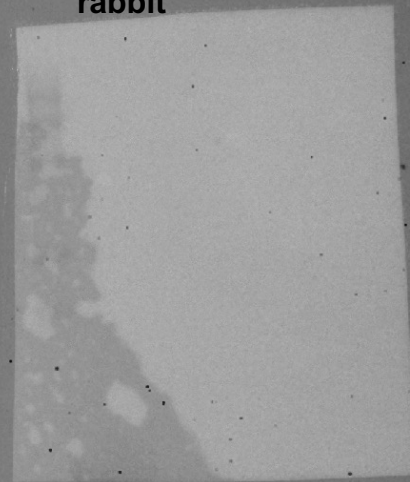

Cont  
Meth 20 uM  
Meth 100 uM  
Meth 500 uM

Actin

Actin  
Rabbit Ab #8457  
Cell Signaling  
1:1000  
rabbit

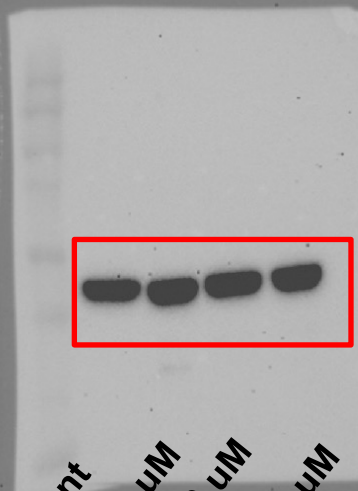

Figure 3D

Cont  
Meth 20 uM  
Meth 100 uM  
Meth 500 uM

ATF4  
Rabbit Ab #11815  
Cell Signaling  
1:1000  
rabbit

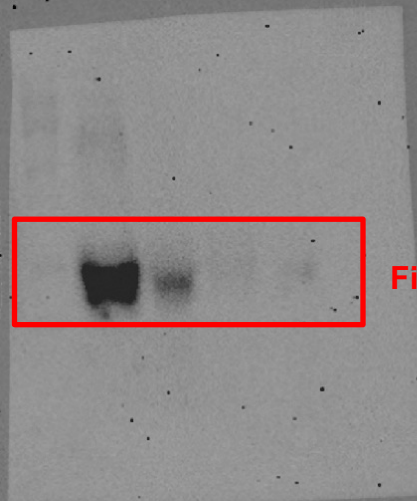

Figure 3D

Cont  
Meth 20 uM  
Meth 100 uM  
Meth 500 uM
