# Supplementary material for: Methionine as a regulator of bone remodeling with fasting
Source: JCI journal article supplement (doi:10.1172/jci.insight.177997), 2024-05-21
Supplement: sd1 [file 1]

**Table S1:** Characteristics of study participants at pre-baseline visit.

|                                        | <b>Females</b><br>(n=7) | <b>Males</b><br>(n=3) |
|----------------------------------------|-------------------------|-----------------------|
| <b>Age (years)</b>                     | 28.2 [23.9, 39.8]       | 30.3 [21.8, 32.6]     |
| <b>BMI (kg/m<sup>2</sup>)</b>          | 26.5 [25.2, 28.3]       | 28.4 [27.8, 29.1]     |
| <b>Bone mineral density</b>            |                         |                       |
| Lumbar spine (g/cm <sup>2</sup> )      | 1.057 [0.930, 1.229]    | 1.079 [1.029, 1.188]  |
| Lateral spine (g/cm <sup>2</sup> )     | 0.884 [0.853, 0.893]    | 0.935 [0.833, 0.939]  |
| Total hip (g/cm <sup>2</sup> )         | 1.085 [0.983, 1.142]    | 1.126, [1.116, 1.227] |
| Femoral neck (g/cm <sup>2</sup> )      | 0.901 [0.808, 0.979]    | 1.077 [1.030, 1.085]  |
| Distal 1/3 radius (g/cm <sup>2</sup> ) | 0.725 [0.710, 0.729]    | 0.826 [0.740, 0.911]  |

Median [interquartile range]

**Table S2.** Primer sequence.

| <b>Human genes qPCR</b> |                                     |
|-------------------------|-------------------------------------|
| <b>Genes</b>            | <b>Primers</b>                      |
| COL1A1                  | Forward:<br>GAGGGCCAAGACGAAGACATC   |
|                         | Reverse:<br>CAGATCACGTCATCGCACAAAC  |
| ALPL                    | Forward:<br>ACTGGTACTCAGACAACGAGAT  |
|                         | Reverse:<br>ACGTCAATGTCCCTGATGTTATG |
| OPG                     | Forward:<br>GTGTGCGAATGCAAGGAAGG    |
|                         | Reverse:<br>CCACTCCAAATCCAGGAGGG    |
| OPN                     | Forward:<br>GAAGTTTCGCAGACCTGACAT   |
|                         | Reverse:<br>GTATGCACCATTCAACTCCTCG  |
| OCN                     | Forward: GCGCTACCTGTATCAATGG        |
|                         | Reverse: GTGGTCAGCCAACTCGTCA        |
| ATF4                    | Forward: GTTCTCCAGCGACAAGGCTA       |
|                         | Reverse: ATCCTGCTTGCTGTTGTTGG       |
| RUNX2                   | Forward:<br>TCAACGATCTGAGATTTGTGGG  |
|                         | Reverse:<br>GGGGAGGATTTGTGAAGACGG   |
| STAB2                   | Forward: CATGCCACAGTCCGCAATG        |
|                         | Reverse:<br>GGCCCAGAACACAATAGTCTGA  |
| OSTERIX                 | Forward:<br>TTTGCTCCCCTTAATCCAGCC   |
|                         | Reverse:<br>CCTGGCAATTAGGGCAGTCG    |
| CREB                    | Forward:<br>AGTTTCAGCCGTCATTTACC    |
|                         | Reverse:<br>AGCACTACCATCAAATTGTCGC  |
| PLOD2                   | Forward:<br>TTATTGAGCAACCAACCCCTTT  |
|                         | Reverse:<br>GGCTTCCGCTTGACTTAGATTT  |
| PLOD3                   | Forward:<br>CTGAAGAAGTTCGTCCAGAGTG  |
|                         | Reverse:<br>ACCGATGAATCCACCAGAATTG  |
| BSP                     | Forward:<br>CACTGGAGCCAATGCAGAAGA   |
|                         | Reverse:<br>TGGTGGGGTTGTAGGTTCAA    |
| <b>Mouse genes qPCR</b> |                                     |
| <b>Genes</b>            | <b>Primers</b>                      |
| <i>Col1a1</i>           | Forward: GCTCCTCTTAGGGGCCACT        |

|              |                                     |
|--------------|-------------------------------------|
|              | Reverse:<br>ATTGGGGACCCTTAGGCCAT    |
| <i>Alpl</i>  | Forward:<br>GGCTGGAGATGGACAAATTCC   |
|              | Reverse:<br>CCGAGTGGTAGTCACAATGCC   |
| <i>Sost</i>  | Forward:<br>AGCCTTCAGGAATGATGCCAC   |
|              | Reverse:<br>CTTTGGCGTCATAGGGATGGT   |
| <i>Dkk1</i>  | Forward:<br>CTCATCAATTCCAACGCGATCA  |
|              | Reverse:<br>GCCCTCATAGAGAACTCCCG    |
| <i>Dstn</i>  | Forward:<br>GTTCAGGTTGCGGATGAAGTA   |
|              | Reverse:<br>GCGACAATCTTTTTTCAGGAAGC |
| <i>Opg</i>   | Forward:<br>CAGAGAAGCCACGCAAAGTG    |
|              | Reverse:<br>AGCTGTGTCTCCGTTTTATCCT  |
| <i>Opn</i>   | Forward:<br>ATCTCACCATTCCGATGAGTCT  |
|              | Reverse:<br>TGTAGGGACGATTGGAGTGAAA  |
| <i>Ocn</i>   | Forward:<br>CTGACCTCACAGATCCCAAGC   |
|              | Reverse:<br>TGGTCTGATAGCTCGTCACAAG  |
| <i>Runx2</i> | Forward:<br>AGAGTCAGATTACAGATCCCAGG |
|              | Reverse:<br>TGGCTCTTCTTACTGAGAGAGG  |
| <i>Atf4</i>  | Forward: TCCTGAACAGCGAAGTGTTG       |
|              | Reverse: ACCCATGAGGTTTCAAGTGC       |
| <i>Esp</i>   | Forward:<br>GCCAGGTGGATTTGACTATGC   |
|              | Reverse:<br>GACTCGTTGGTATGAGCTTGG   |
| <i>Igf-1</i> | Forward: GTGGGGGCTCGTGTTCCTC        |
|              | Reverse: GATCACCGTGCAGTTTTCCA       |

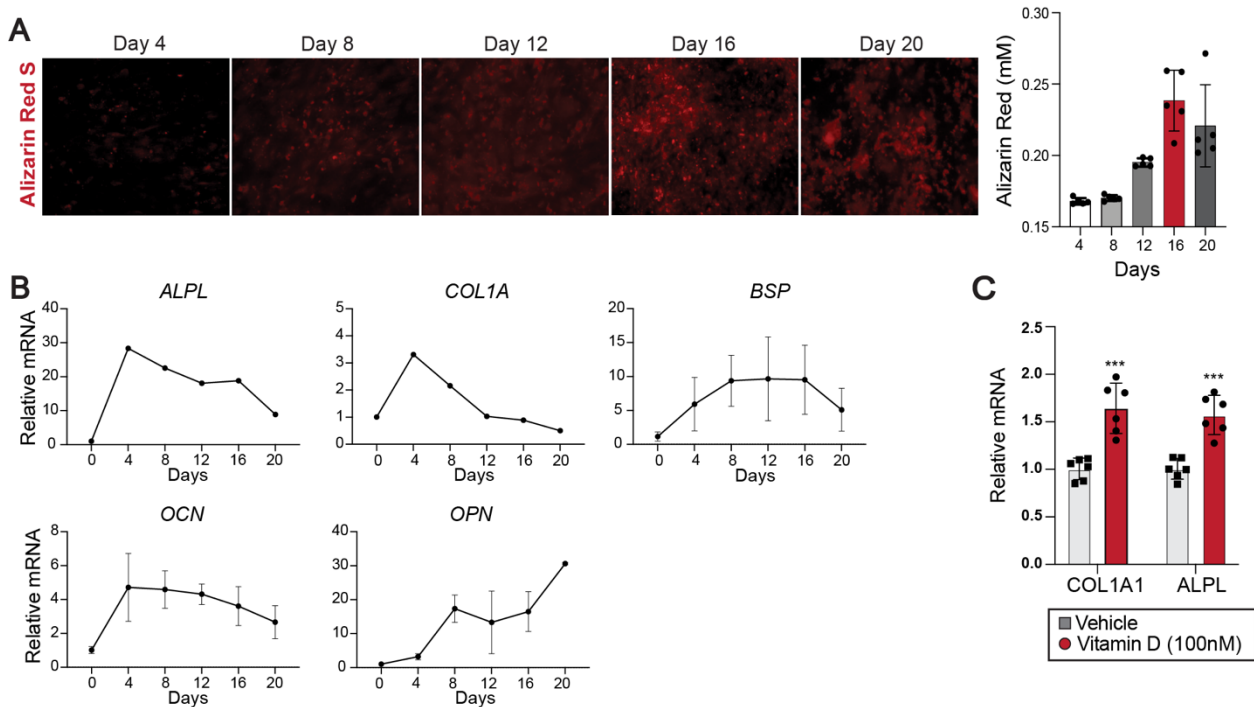

**Figure S1. Human osteoblast model.**

**(A)** Alizarin Red S Staining of differentiating hFOB1.19 cells. Cells were cultured at 34°C for 48 hours and then cultured at 39.5°C for 4, 8, 12, 16 and 20 days. Red staining shows calcium deposition; graph shows calcium concentration (mM) after 4, 8, 12, 16 and 20 days of differentiation.

**(B)** Gene expression measured by qPCR of immature osteoblasts (Day 0 - cells were cultured at 34°C for 48 hours), and in differentiating osteoblasts after transfer to 39.5°C. mRNA expression was normalized to GAPDH.

**(C)** Gene expression measured by qPCR after 16 days of differentiation at 39.5°C. Treatment with either vehicle or vitamin D (1 $\alpha$ ,25-Dihydroxyvitamin D3 - 100nM) was initiated for 48 hours. mRNA expression was normalized to GAPDH. Representative of two experiments; \*\*\* p<0.001, t-test (n=6 technical replicates), Shapiro-Wilk test p>0.05.

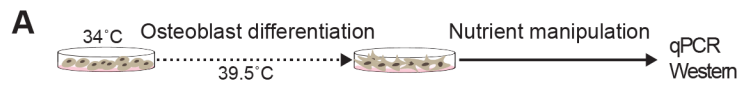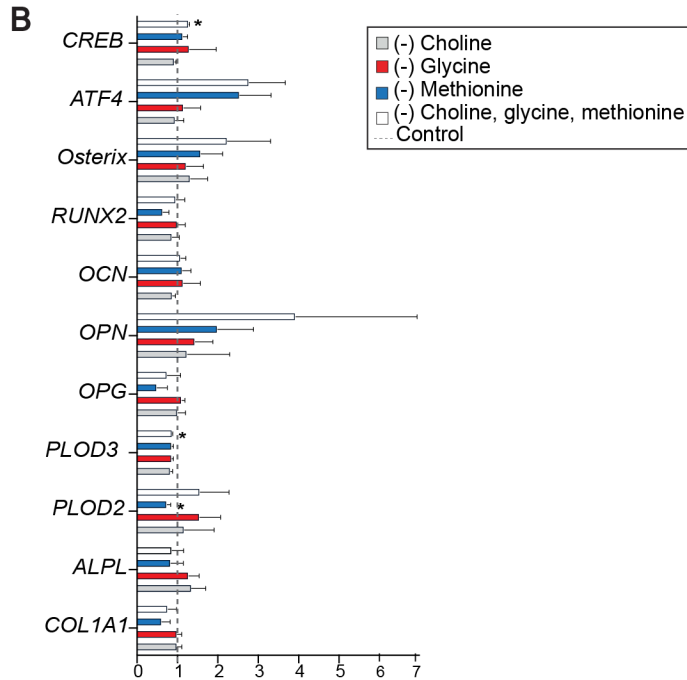

**Figure S2. Osteoblast sensitivity to methionine depletion.**

**(A)** Experimental design.

**(B)** Gene expression measured by qPCR. After 16 days of differentiation, choline, glycine and/or methionine were removed from the media for 48 hours leaving the 10%serum as the only source. mRNA expression was normalized to GAPDH; n=3 biological replicates, n=4 technical replicates.

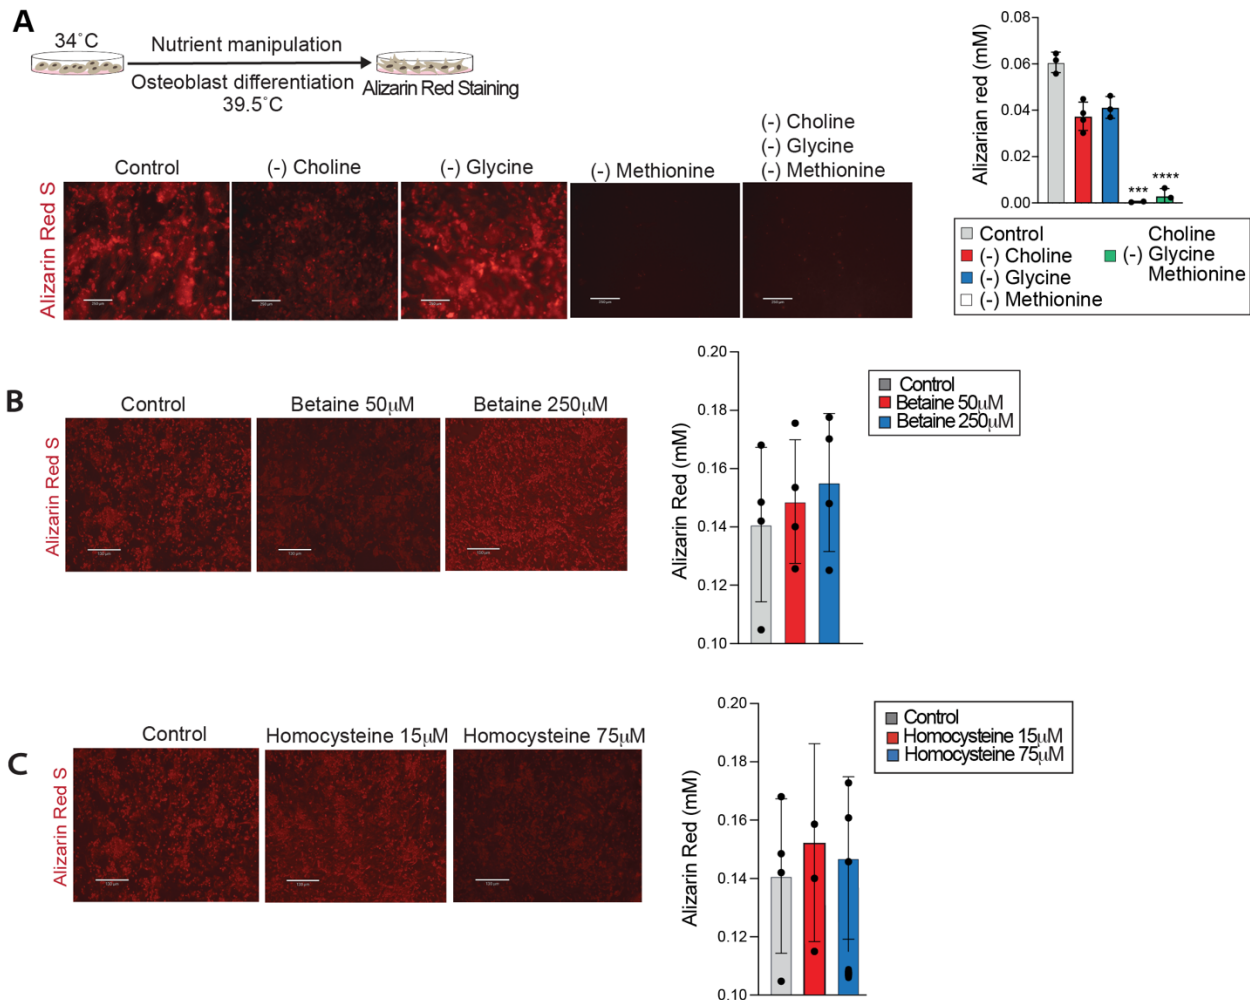

**Figure S3. Osteoblast differentiation is sensitive to methionine depletion.**

**(A)** Experimental design. Alizarin Red S Staining; scale bars=250 µm. Choline, glycine and/or methionine were removed from the media with initiation of differentiation, i.e., after transferring the cells to 39.5oC. Right graph: Alizarin Red S Staining quantification. Significance assessed relative to control; \*\*p<0.01 One-way ANOVA, multiple comparison correction (3 technical replicates).

**(B)** Alizarin Red S Staining; scale bars=130µm. Cells were cultured at 34oC for 48 hours and then cultured at 39.5oC for 16 days. Treatment with two doses of betaine (50µM and 250µM) was initiated with onset of differentiation, i.e., after transferring the cells to 39.5oC. Red staining shows calcium deposition; graph shows calcium concentration (mM).

**(C)** Alizarin Red S Staining; scale bars=130µm. Cells were cultured at 34oC for 48 hours and then cultured at 39.5oC for 16 days. Treatment with two high doses of excess homocysteine (15µM and 75µM) was initiated with onset of differentiation, i.e., after transferring the cells to 39.5oC. Red staining shows calcium deposition; graph shows calcium concentration (mM).
